# Supplementary material for: Evaluating the Combined Anticancer Response of Checkpoint Inhibitor Immunotherapy and FAP-Targeted Molecular Radiotherapy in Murine Models of Melanoma and Lung Cancer
Source: MDPI journal article supplement (doi:10.3390/cancers14194575), 2022-09-21
Supplement: s1 [file s1]

## Supplementary Materials

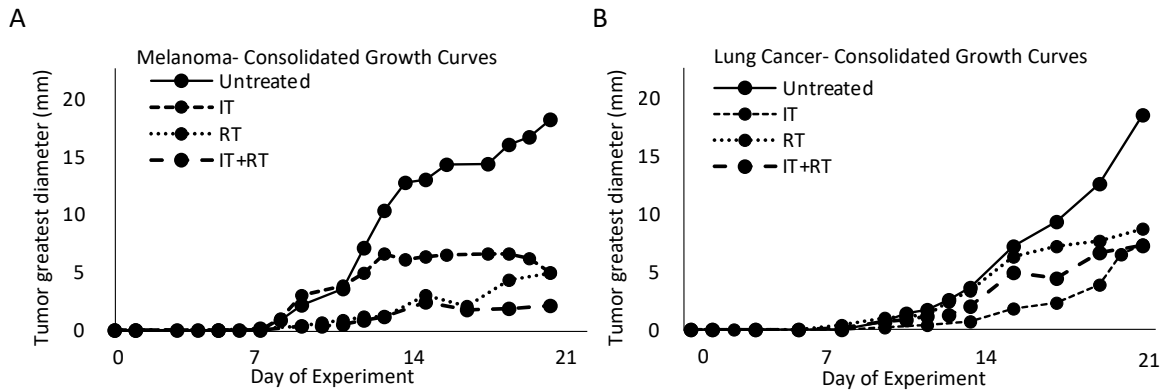

**Supplemental Figure S1.** Average tumor growth at each time point for each treatment group in animals implanted with (A) melanoma and (B) lung cancer, respectively.

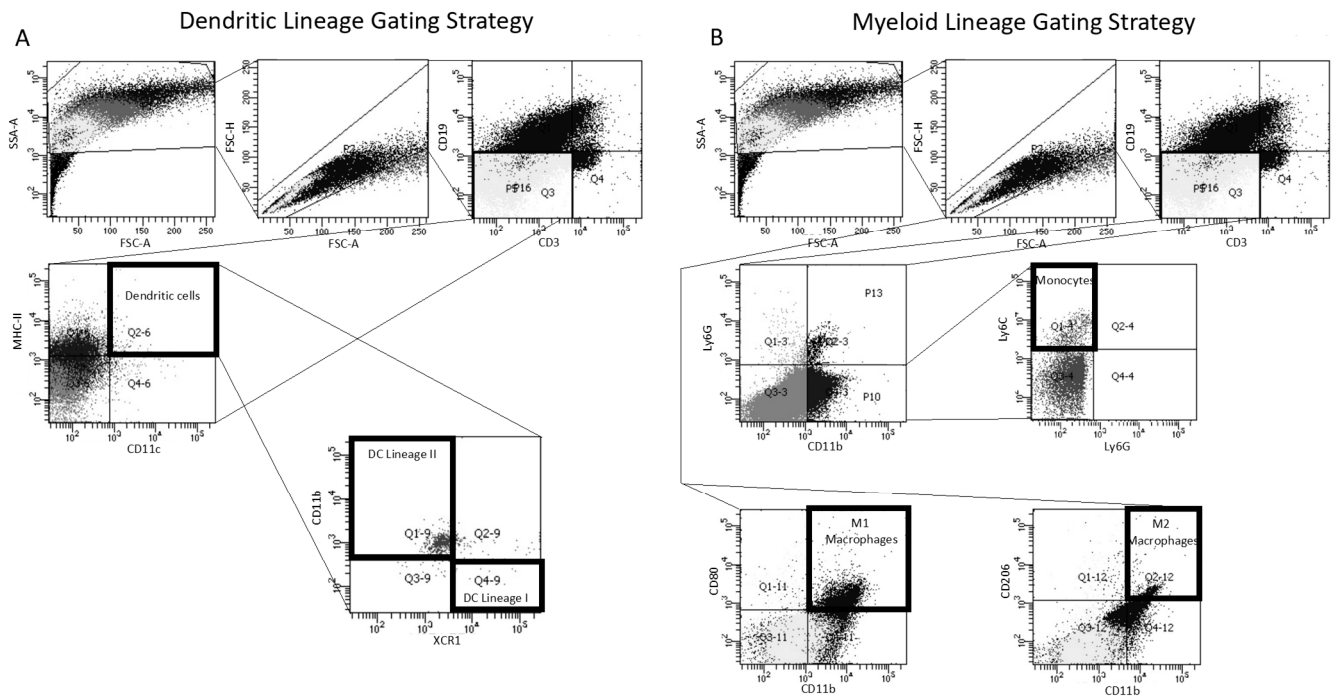

**Supplemental Figure S2.** Representative flow gating graphs for the (A) dendritic lineage and (B) myeloid lineage cell populations analyzed in this study.
